# Supplementary material for: The Spindle Assembly Checkpoint Functions during Early Development in Non-Chordate Embryos
Source: MDPI journal article supplement (doi:10.3390/cells9051087), 2020-04-28
Supplement: s1 [file s1]

**Table S3: Value associated with Figure 2**

| Paracentrotus lividus |                   |            |           |
|-----------------------|-------------------|------------|-----------|
|                       | mitosis (minutes) |            |           |
| embryo                | DMSO              | nocodazole | noco+ rev |
| 1                     | 20                | 100        | 14        |
| 2                     | 24                | 100        | 22        |
| 3                     | 22                | 100        | 21        |
| 4                     | 19                | 100        | 16        |
| 5                     | 22                | 100        | 29        |
| 6                     | 22                | 100        | 15        |
| 7                     | 20                | 60         | 25        |
| 8                     | 20                | 92         | 28        |
| 9                     | 20                | 93         | 18        |
| 10                    | 12                | 94         | 15        |
| 11                    | 26                | 93         | 28        |
| 12                    | 18                | 106        | 26        |
| 13                    | 22                | 100        | 26        |
| 14                    | 24                | 104        | 26        |
| 15                    |                   | 90         | 24        |
| 16                    |                   | 86         | 26        |
| 17                    |                   | 92         | 22        |
| 18                    |                   | 90         | 24        |
| 19                    |                   | 92         |           |
| 20                    |                   | 94         |           |
| 21                    |                   | 114        |           |
| 22                    |                   | 94         |           |
| 23                    |                   | 110        |           |
| 24                    |                   | 92         |           |
| 25                    |                   | 98         |           |

| Clytia hemisphaerica |                   |            |           |
|----------------------|-------------------|------------|-----------|
|                      | mitosis (minutes) |            |           |
| embryo               | DMSO              | nocodazole | noco+ rev |
| 1                    | 11                | 45         | 28        |
| 2                    | 11                | 52         | 26        |
| 3                    | 11                | 52         | 14        |
| 4                    | 11                | 67         | 19        |
| 5                    | 12                | 31         | 31        |
| 6                    | 11                | 30         | 15        |
| 7                    | 9                 | 35         | 19        |
| 8                    | 13                | 51         | 18        |
| 9                    | 14                | 40         | 24        |
| 10                   | 12                | 38         | 24        |
