# Supplementary material for: The Spindle Assembly Checkpoint Functions during Early Development in Non-Chordate Embryos
Source: MDPI journal article supplement (doi:10.3390/cells9051087), 2020-04-28
Supplement: s1 [file s1]

a)

$$V_{\text{small\_cell}} = \frac{4/3 \pi r_a^2 r_b}{2}$$

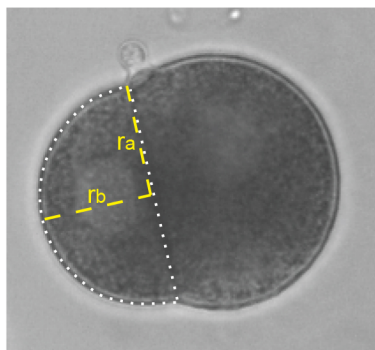
 $0.4 \pm 0.5$ 

$$V_{\text{large\_cell}} = \frac{4/3 \pi r^3}{2} - \frac{4/3 \pi r_a^2 r_b}{2}$$

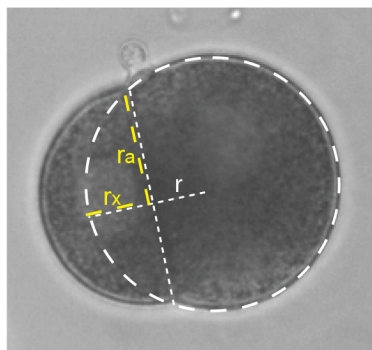
 $1 \pm 0.9$ 

b)

*M. galloprovincialis*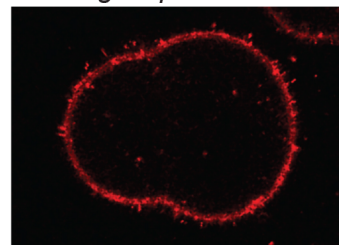

Cell Mask Orange

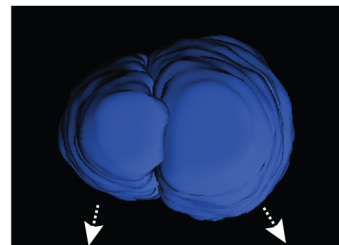

3D rendering

 $0.4 \pm 0.01 \quad 0.8 \pm 0.02 \quad \times 10^5 \mu\text{m}^3$ 

c)

*P. lividus*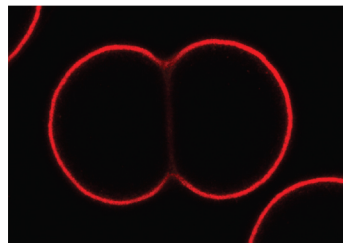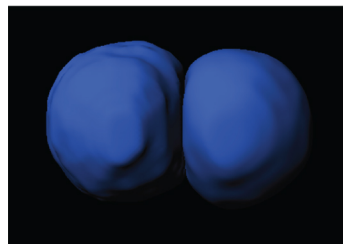
 $1.9 \pm 0.2$ 
*P. mammillata*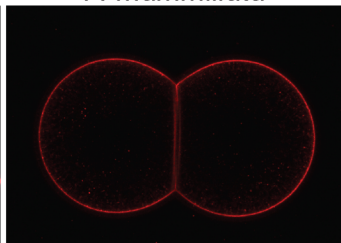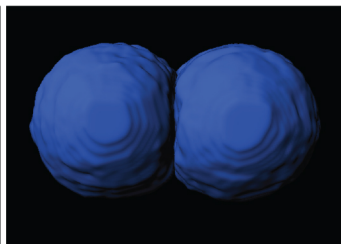
 $6.5 \pm 1$ 
*B. lanceolatum*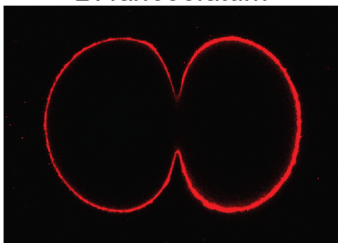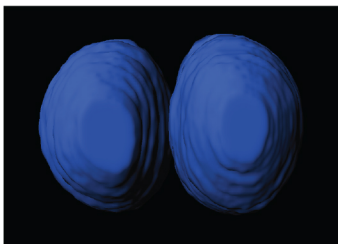
 $5 \pm 0.3$ 
*C. hemisphaerica*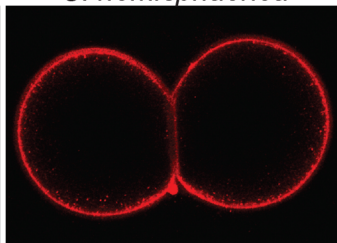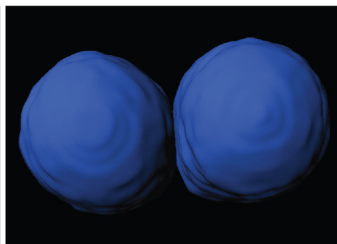
 $19.5 \pm 2.5$ 
 $\times 10^5 \mu\text{m}^3$ 

Cell Mask Orange

3D rendering

**Figure S3:** Measurement of volume in 2-cell stage embryos.

a) Mathematical calculation of cell volume in *M. galloprovincialis*. Average calculated volume is reported below each panel. b-c) Cell Mask Orange staining and 3D rendering of live 2-cell stage embryos of indicated species. Volume of 3D reconstruction is reported under each panel.
