# Supplementary material for: The Spindle Assembly Checkpoint Functions during Early Development in Non-Chordate Embryos
Source: MDPI journal article supplement (doi:10.3390/cells9051087), 2020-04-28
Supplement: s1 [file s1]

**Table S4: Values associated with Figure 3**

| <i>P. mammillata</i> _time (minutes) |      |    |    |            |      |     |    |     |     |     |     |     |
|--------------------------------------|------|----|----|------------|------|-----|----|-----|-----|-----|-----|-----|
| DMSO                                 |      |    |    | Nocodazole |      |     |    |     |     |     |     |     |
| embryo                               | cell | M  | I  | embryo     | cell | M 1 | I1 | M 2 | I 2 | M 3 | I 3 | M 4 |
| 1                                    | 1    | 13 | 16 | 1          | 1    |     | 16 | 14  | 20  | 12  | 30  | 16  |
| 1                                    | 2    | 14 | 15 | 1          | 2    |     | 16 | 14  | 20  | 12  | 28  | 16  |
| 2                                    | 1    | 12 | 16 | 2          | 1    | 22  | 26 | 22  | 30  | 28  | 50  | 28  |
| 2                                    | 2    | 12 | 16 | 2          | 2    | 22  | 26 | 20  | 32  | 24  | 48  |     |
| 3                                    | 1    | 13 |    | 3          | 1    | 14  | 22 | 18  | 24  | 18  | 42  | 12  |
| 4                                    | 1    | 15 |    | 3          | 2    | 16  | 20 | 18  | 26  | 14  | 38  | 12  |
| 4                                    | 2    | 16 |    | 4          | 1    | 20  | 18 | 20  | 18  | 14  | 36  | 8   |
| 5                                    | 1    | 13 |    | 4          | 2    | 16  | 20 | 20  | 20  | 14  | 36  | 14  |
| 5                                    | 2    | 18 |    | 5          | 1    |     | 16 | 12  | 24  | 12  | 36  | 14  |
| 6                                    | 1    | 12 |    | 5          | 2    |     | 16 | 14  | 22  | 12  | 34  | 16  |
| 6                                    | 2    | 12 |    | 6          | 1    |     | 14 | 16  | 26  | 10  | 44  | 12  |
| 7                                    | 1    | 13 |    | 6          | 2    |     | 16 | 16  | 24  | 10  | 44  | 12  |
| 7                                    | 2    | 13 |    | 7          | 1    |     | 20 | 14  | 22  | 10  | 32  | 14  |
| 8                                    | 1    | 13 |    | 7          | 2    |     | 20 | 14  | 22  | 10  | 34  | 18  |
| 8                                    | 2    | 14 |    | 8          | 1    | 16  | 22 | 12  | 24  | 12  | 36  | 12  |
| 9                                    | 1    | 8  | 16 | 8          | 2    | 14  | 22 | 14  | 20  | 12  | 30  | 14  |
| 9                                    | 2    | 10 |    | 9          | 1    | 14  | 20 | 12  | 26  | 10  | 36  | 12  |
| 10                                   | 1    | 8  | 14 | 9          | 2    | 12  | 20 | 12  | 30  | 10  | 40  | 12  |
| 10                                   | 2    | 8  |    | 10         | 1    | 21  | 14 | 20  | 22  | 17  | 34  | 16  |
| 11                                   | 1    | 10 | 16 | 10         | 2    | 20  | 16 | 17  | 24  | 17  | 35  | 14  |
| 11                                   | 2    | 10 |    | 11         | 1    | 21  | 14 | 18  | 22  | 16  | 35  | 13  |
| 12                                   | 1    | 12 |    | 11         | 2    | 20  | 15 | 16  | 25  | 14  | 33  | 16  |
| 12                                   | 2    | 12 |    | 12         | 1    | 17  |    |     |     |     |     |     |
| 13                                   | 1    | 10 |    | 13         | 1    | 19  | 18 | 17  | 25  | 14  | 39  | 14  |
| 13                                   | 2    | 12 |    | 13         | 2    | 19  | 18 | 17  | 26  | 17  | 36  | 15  |
| 14                                   | 1    | 12 | 16 | 14         | 1    | 19  | 19 | 18  | 24  | 18  | 35  | 16  |
| 14                                   | 2    | 10 |    | 14         | 2    | 20  | 18 | 21  | 21  | 16  | 38  |     |
| 15                                   | 1    | 12 | 16 | 15         | 1    | 18  | 18 | 18  | 23  | 14  | 37  | 13  |
| 15                                   | 2    | 12 |    | 15         | 2    | 20  | 17 | 17  | 24  | 16  | 36  | 16  |
| 16                                   | 1    | 10 | 10 | 16         | 1    | 22  | 24 | 16  | 20  | 12  | 26  | 12  |
| 16                                   | 2    | 10 |    | 16         | 2    | 14  | 32 | 14  | 22  | 12  | 30  | 10  |
| 17                                   | 1    | 8  | 8  | 17         | 1    | 12  | 6  | 12  | 12  | 14  | 20  | 12  |
| 17                                   | 2    | 8  |    | 17         | 2    |     |    |     |     | 14  | 22  | 12  |
| 18                                   | 1    | 8  | 8  | 18         | 1    | 14  | 8  | 12  | 12  | 14  | 20  | 12  |
| 18                                   | 2    | 8  |    | 18         | 2    |     |    |     |     | 12  | 18  | 12  |
| 19                                   | 1    | 10 | 10 | 19         | 1    | 12  | 10 | 10  | 14  | 12  | 20  | 10  |
| 19                                   | 2    | 12 |    | 19         | 2    | 12  | 10 | 10  | 12  | 12  | 24  | 10  |
| 20                                   | 1    | 8  | 8  | 20         | 1    | 12  | 10 | 12  | 12  | 12  | 24  | 12  |
| 20                                   | 2    | 8  |    | 20         | 2    | 12  | 10 | 12  | 12  | 12  | 24  | 10  |
| 21                                   | 1    | 12 | 8  | 21         | 1    | 12  | 10 | 12  | 14  | 12  | 24  | 12  |
| 21                                   | 2    | 12 |    | 21         | 2    | 10  | 12 | 12  | 14  | 12  | 24  | 14  |

|    |   |    |    |    |   |    |    |    |    |    |    |    |
|----|---|----|----|----|---|----|----|----|----|----|----|----|
| 22 | 1 | 8  |    | 22 | 1 |    | 14 | 20 | 20 |    |    |    |
| 22 | 2 | 8  |    | 22 | 2 |    | 14 | 22 | 16 |    |    |    |
| 23 | 1 | 10 |    | 23 | 1 |    |    | 18 | 30 | 18 | 42 | 16 |
| 23 | 2 | 12 |    | 23 | 2 |    |    | 18 | 32 | 16 | 44 | 16 |
| 24 | 1 | 14 | 19 | 24 | 1 | 20 | 18 | 18 | 26 | 16 | 42 | 16 |
| 25 | 1 | 13 | 19 | 24 | 2 |    | 18 | 18 | 26 | 18 | 40 | 18 |
| 26 | 1 | 13 | 18 | 25 | 1 | 18 | 22 | 18 | 26 | 16 | 38 |    |
| 27 | 1 | 16 | 16 | 25 | 2 | 20 | 20 | 16 | 28 | 18 | 42 |    |
| 28 | 1 | 16 | 16 | 26 | 1 | 20 | 20 | 18 | 28 | 14 | 42 | 14 |
| 29 | 1 |    | 14 | 26 | 2 | 20 | 20 | 18 | 26 | 16 | 40 | 16 |
| 30 | 1 | 12 | 14 | 27 | 1 | 20 | 22 | 16 | 26 | 14 | 40 | 14 |
| 31 | 1 |    | 13 | 27 | 2 | 18 | 22 | 18 | 26 | 16 | 42 | 16 |
| 32 | 1 |    | 15 | 28 | 1 | 22 | 18 | 22 | 20 | 20 | 34 | 20 |
| 33 | 1 | 14 | 14 | 28 | 2 | 22 | 16 | 22 | 22 | 20 | 32 | 20 |
| 34 | 1 | 11 | 16 | 29 | 1 | 24 | 16 | 20 | 22 | 16 | 40 | 16 |
| 35 | 1 |    | 14 | 29 | 2 | 22 | 18 | 16 | 26 | 16 | 34 | 16 |
| 36 | 1 | 11 | 15 | 30 | 1 | 18 | 18 | 16 | 28 | 14 | 38 | 14 |
| 37 | 1 |    | 14 | 30 | 2 | 18 | 20 | 16 | 26 | 14 | 38 | 14 |
| 38 | 1 |    | 16 | 31 | 1 | 20 | 20 | 18 | 24 | 14 | 36 | 14 |
| 39 | 1 | 13 | 16 | 31 | 2 | 20 | 20 | 18 | 24 | 12 | 38 | 12 |
| 40 | 1 | 12 | 16 | 32 | 1 |    | 16 | 18 |    |    |    |    |
| 41 | 1 | 13 | 10 | 32 | 2 |    | 16 | 18 |    |    |    |    |
| 42 | 1 | 13 | 10 | 33 | 1 |    | 18 | 16 |    |    |    |    |
| 43 | 1 | 13 | 10 | 33 | 2 |    | 16 | 20 |    |    |    |    |
| 44 | 1 | 13 | 10 | 34 | 1 |    | 16 | 18 |    |    |    |    |
|    |   |    |    | 34 | 2 |    | 16 | 18 |    |    |    |    |
|    |   |    |    | 35 | 1 |    |    | 20 | 22 | 20 | 30 | 20 |
|    |   |    |    | 35 | 2 |    |    | 20 | 22 | 22 | 36 | 22 |
|    |   |    |    | 36 | 1 | 20 | 22 | 18 | 36 | 18 | 42 | 18 |
|    |   |    |    | 36 | 2 | 20 | 22 | 22 | 28 | 16 | 40 | 16 |
|    |   |    |    | 37 | 1 | 14 | 28 | 14 | 40 | 20 | 48 | 20 |
|    |   |    |    | 37 | 2 | 14 | 28 | 14 | 42 | 20 | 46 | 20 |
|    |   |    |    | 38 | 1 | 20 | 17 |    | 26 | 18 | 36 | 20 |
|    |   |    |    | 39 | 1 | 19 | 20 |    | 29 | 19 | 40 | 17 |
|    |   |    |    | 40 | 1 | 19 | 20 |    | 29 | 20 | 35 | 18 |
|    |   |    |    | 41 | 1 | 18 | 20 |    | 29 | 17 | 39 | 15 |
|    |   |    |    | 42 | 1 | 16 | 18 | 16 | 28 | 12 | 40 | 16 |
|    |   |    |    | 42 | 2 | 16 | 18 | 16 | 28 | 12 | 38 | 14 |
|    |   |    |    | 43 | 1 | 18 | 18 | 16 | 30 | 14 | 34 | 16 |
|    |   |    |    | 43 | 2 | 18 | 12 | 18 | 28 | 16 | 36 | 14 |
|    |   |    |    | 44 | 1 | 20 | 16 | 16 | 28 | 16 | 38 | 14 |
|    |   |    |    | 44 | 2 | 18 | 16 | 18 | 24 | 16 | 38 | 14 |
|    |   |    |    | 45 | 1 |    |    | 20 | 20 | 14 | 34 | 16 |
|    |   |    |    | 45 | 2 |    | 12 | 18 | 20 | 14 | 32 | 16 |
