# Supplementary material for: The Spindle Assembly Checkpoint Functions during Early Development in Non-Chordate Embryos
Source: MDPI journal article supplement (doi:10.3390/cells9051087), 2020-04-28
Supplement: s1 [file s1]

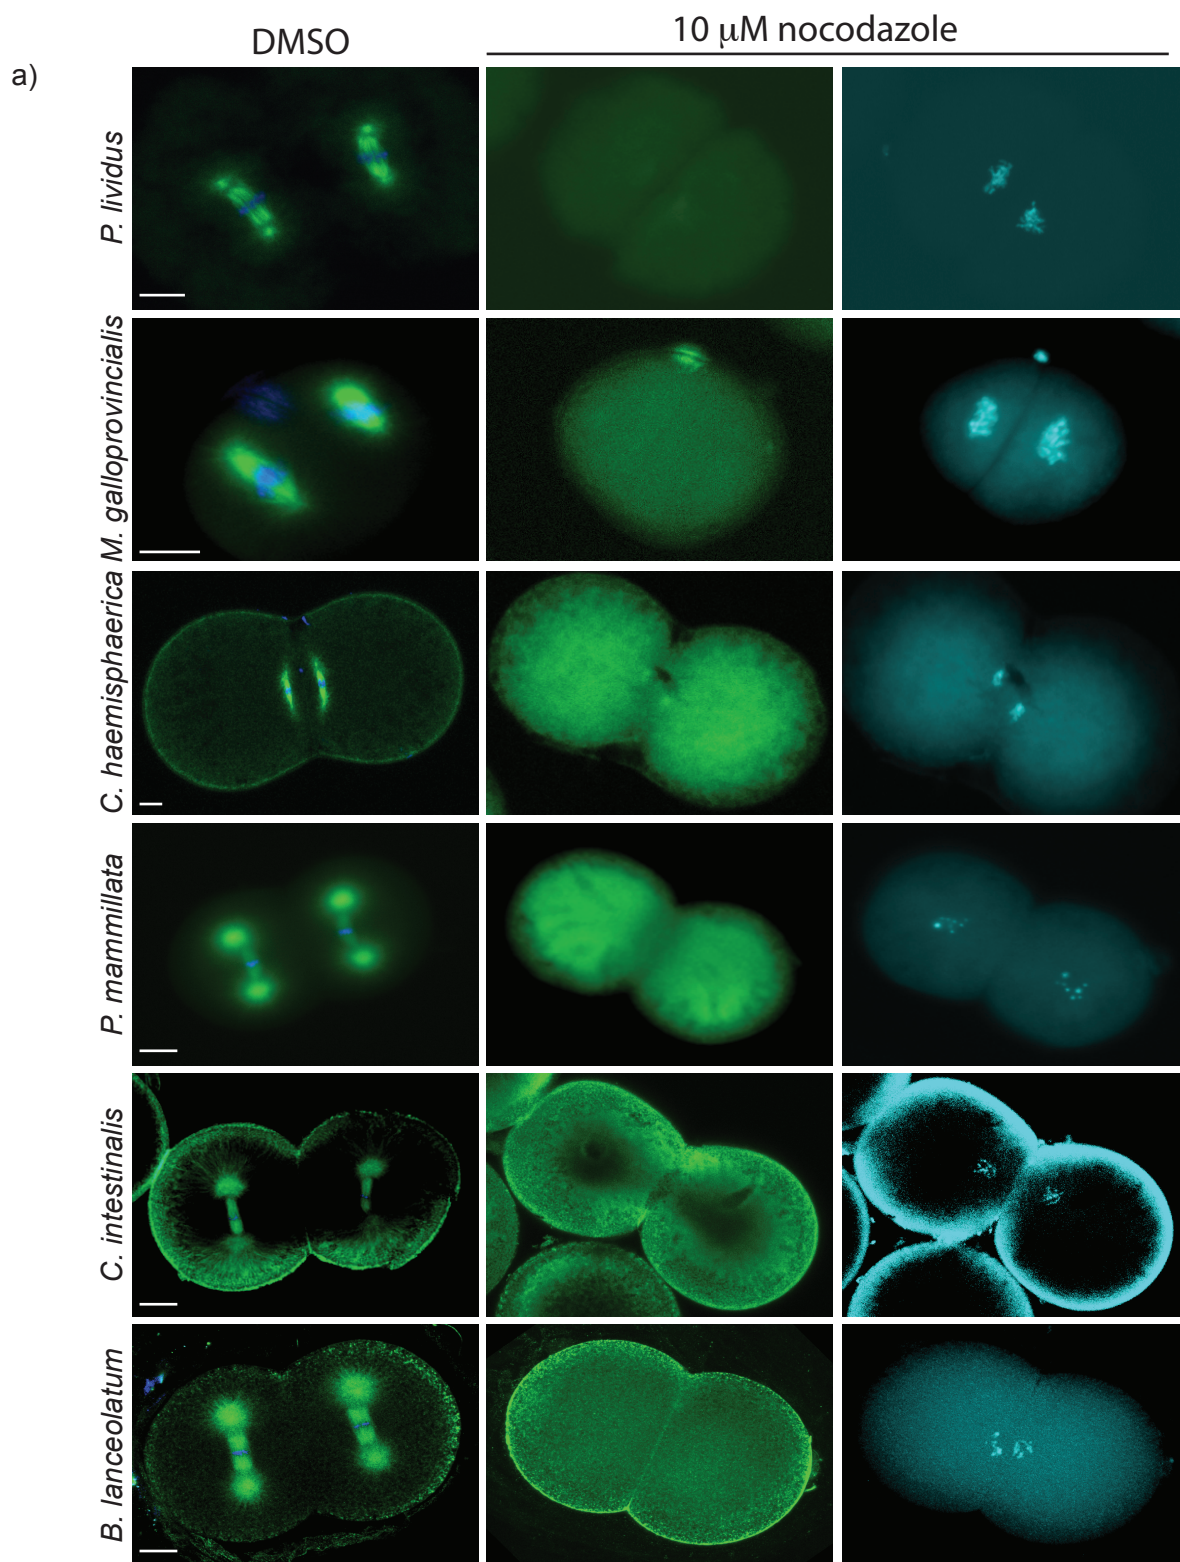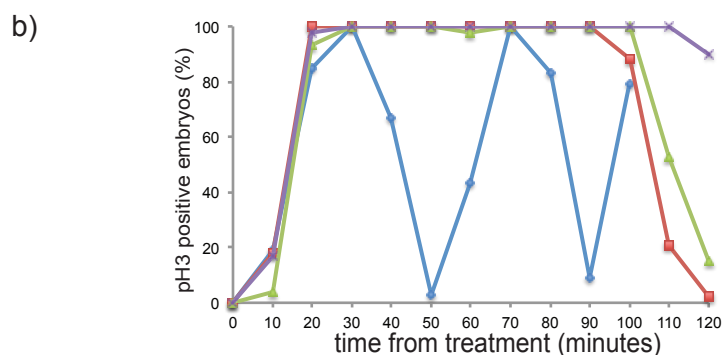

**Figure S1:** Effect of nocodazole on spindle organization and mitotic progression.

a) 2-cell stage embryos fixed and stained for microtubules (anti-tubulin, green) and for DNA (hoechst, blue), after 15 minutes incubation in DMSO, or in 10  $\mu$ M nocodazole. Representative embryos in metaphase stage are shown. b) Quantification of pH3 positive 2-cell *P. lividus* embryos treated with DMSO (blue), 10nM (red), 100nM (green) and 1 $\mu$ M (magenta) nocodazole. Scale bars are 30 $\mu$ m.
