# Supplementary material for: The Spindle Assembly Checkpoint Functions during Early Development in Non-Chordate Embryos
Source: MDPI journal article supplement (doi:10.3390/cells9051087), 2020-04-28
Supplement: s1 [file s1]

## S2 Table: Sequences of analyzed SAC components

*Phallusia mammillata*:

### Mad1:

phmamm.CG.MTP2014.S241.g05985

MKVSVDNTDLSNTFFFMFVLVACGFEHVDVNSRQLRNTNLSGTSNTIKENTSKASDVMMRV  
KMKQIEAAHASSERAHVKANIELESKFELTAQNKVLKDKADSLQGVNSLTTKLLDMQD  
EVKQMRKDKEAEISKWENSYLHLETCLKQEADSRLSEEMMMVTSQNQQQLSEHNLMLQSQNN  
ILNLKCEEHYTHMDQYKRSLEASQTVLKDYQETKSKLARSEQQVNRLKQELATLQDTKTL  
AKTLKEEMNRLRHIEVEFKKIHEENYLLRQNNDNFALLQEKLSVESKLARAELQCANVP  
SLEVENNMLTQRIEQLQNMSTKNEHSSLOIELSSLSQKLSTAQEEENLNLKAELESTLRNH  
NIELNSSIKAIDQKLTEKSEICASLNAQLLRRLKRAGLLAKERDSIREILQSYDAELTMT  
SHTTQLNKRINEEAASNKRLYHRIEELEDENKKLAEEMKNRLGIKTLESQKELKETPDS  
PMVSQTMNEENSVLREKIQKYEAERPTLIEKIEQLEAWIEQGKIKGDYNPENTKVIHFAM  
NPADLAHQSKQDVANLKEECIRLRQKLREAADGHEVSVAEVESLKLAEQEEASRAELRNQ  
RLKEVFTKKIQEFQACYSLTGYRIDTLNDSQFRLVSIKAAETELCTDERERRNEVIGDG  
ILNYSBGIGEFALASPKQYSNVFKCYFSESFQSTNPGIAASSKGCKF

### Mad2:

phmamm.CG.MTP2014.S64.g02288

MAAAKQLNKITLKGSAIVSEFFFFYGINNILYQRGVYPPEMFKQEKKYGLTILVSTDETL  
LTYLNDNVLPQLQEWLEKGAVKRLVVVIRESETNETLERWQFEIQCESDKSENGKPKATKS  
KETINSEIRAVIRQVTATVTFLPLLEPCPSFDLLFYTDKNLEVSEKWEDSSPCLIPNSEE  
VKLRFSFSTSVHKVDGAVSYKFSM

### Bub1:

phmamm.CG.MTP2014.S849.g12351

MPLTNTGASVLTDVYGGDNEVSEINGMFQMPLTNTGASVLTDVYGGDNEVSMMPLAEP  
VDKPAFEIFCDEDEDEQQMPLKFNIFKDDDKSEDSENIPTGYVSPPKRHNLSGILQPAV  
GFELADPDEDSQEEEDDNIVGVEPLLTVEPAPTFLDDVTIAAGQNLPGETNLPLNQLQDI  
PCTSSNNLTNSYQANRSAMSTTNKFDDSIQINFGNRNKISAESTTYWQGSaihDVTQKDV  
IEKTVNPPQEVTEANCTEIGNQQQGVKKLSPILEASYEYKSVQSRSLTSSETDGOAS  
VAITTTGKSFIHPPTINRKPLGELSAITYDPMKTSTAPTMYDMEPEFSSFMPHQGISKLQ  
LHNDNDETTTSYSPMCLPVLNNTSIHPIELNPDAIMEDELCDQMSTSLQIAPPPDHVSFD  
VTTFLSETNNTLTVSGRLTIVEDPWDEELLNRLPPQFAKNLHVHIGKTPVARKGSTLNLG  
DTTYHLADMLGRGGFAKVYKATVEGKSNTIAAVKIQSPPHIWESYIVSEAKRRCNDSFR  
SSLLQIHATSVFPEASFIVSEFLSGGTLLEFVRDCAVHSRVIDDIDITFKVMKIVNSLHE  
AGIIHGDIKPDNFMVVSERDPCKGRLGPLAPVLKLIDFGRAIDMKAFPAFTAFAKKNCGTS  
GFVCSQMMDKLPWNYHIFKLDSFQQTDFHGLAGTIHVVLNLCYMTIIKQNSGEWSITKSF  
PRGNRHLWSSFFKSLNVTSPKDELFPVDSPLNLLQLFGAAT

### Bub3:

phmamm.CG.MTP2014.S36.g01423

MSNEFKLNECPKDGISSVKFSPSTAQFLLASSWDVSVRLYDITENTCRFRYDHKAPVLDC  
CFSDSVHAWSGALDGSLLMYDFNMGRESLAGMHNAIRCVEYCSETNVIATGGWDETVKL  
WDPRNKSSIGSYSQPGKVYTMSVCGHRLIVGTSGKSVVWDLRNMGYVEQRRESSLKYQT  
RCIRSFPPNKQGFVLSSIEGRVAVEYLDPSAEQKKKYAFKCHRIKEDGIERIFSVHTIAF  
HNRYNTFATGGADGFVNMWDGFNKKRLCQFHRFPAPVSSVAFSDDGSVLAVAASPLYSSD  
LEPNRDVEDAIFIRHVTDAETPKK

### Mps1:

phmamm.CG.MTP2014.S420.g08523

MFKENECVAESDKENTNTLNVTGKVTSNLKEVGDDPEKWNQILQDCLKLDNTLHKKRMLK  
QFFLQAKKNIDPAVHRRSETYARILAEALFISLSSRQDAGVAFRFATDTCRPVPFIHVA  
FAQYEVDSEGRLEKAKKILELGKMVLPSKEISDAIKRLKSNETNLGLKNDPMFNSSVLRD  
NTNSMSTPKVAKYDFGDSIMKIFPTSKHSLTDTCIKSPIRPAHIKRELEALDFPESPRSS  
VTKPSFFGITTPSPRSLFSVTKSLANRHALQTKQEHLTTSVQKPMMTSKTNGQRSGPVN  
KPRRIPCALQPENDQKHKSEYPMVFPLASEVGATPTDNRIEKVFPTQPVSQVSASPTRPT  
FPPPIRQPQPNLAAHAIKTDEIASWMNNVQVLRHHKSYIVLKMIGEGSSKVFVFDVA  
AKQIKAVKHVSLKNCDAVKKGFLDEVKFLEQLRNNPNIVHLYTYELTGDDLYLVMECGS  
TDLSKSLKRNNRLEPEYVWYFWKKMLAALNTVHQHGIHLDLKPANFLIVKGTCLKLIDF  
GIANSIQSDVTSVFKDTMVGTLNYMAPEAIVDMSSGGDGNLDFKISPRADVWSLGCILY  
LMMYGRTPFQHINHQIRKLSAITNPNTRIEFPQYGDKRLVQIVQSCLMRDAKRRPTVEQL  
IKHS

*Ciona intestinalis*:

**Mad1:** XP\_002126990.1 (Gene model: KH2012:KH.C9.233)

MEQRFALGMPDNTKVMRIMGEFHDMSAAKENSMMQSSHISAIPFSLPSDDDHKQSTALQV  
SNVLSKVKLKQLESNHSSEKLLIQRVTNLESKIKELEMEKQILHERCSKYQVQVTDLTQQS  
IDLSDKVKDLEQTKHEEILKWEESAMEIQRLKQQNEQKFAMQTQMLNERINDLMSQKLTMEK  
EEQLFEINQAE LCSQVEQYKSQAQAAAYQLQAKYDEKTNQVLQAEHTIHELKMRLENVQEAEN  
MAHILKQDMNRLRQLEIDVSHLSRENSNLKLNQENCALLKEQLIAANTKLQRLKEKCNEIPK  
IVAENEALKEKLNKTQNTATTANVDDNVSLQNHSFNKLEKEIETLKEQLATSKSRSLDR  
KNAAEYEIKFTEQTEAISLKAQLIRLKKRASLFAYERDSIRSLQTYDAELTMTSHTTQLN  
KRLDNMTSVNKKLHDRIVELELESQRHVEDTLRHKLQVKQMLGGSLSGQKQEESSISSL  
EEKSNEVLALKEKITSFETERTNLMEKIANLEAWIEQRNLNGDYNPDKTKVLHFTMNPADLA  
HQQSKRDITELKEQNAKLQLKLRQLEEGHEVSMSEIEFSKEAKTKLNAAELKNQRLKEVFSK  
KIQEFRQVCYSLMGFQVVCSSDGKFKLLSMYADSETDCLEFEVKSSGEIELLETEYTKTLTD  
LISLHLHHQNSIPMFLSALTVNLFQQQTMMAD

**Mad2:** XP\_002131760.1 (Gene model: KH2012:KH.C14.279)

MASNKQLNKITLKGSAIVSEFFFYGINNIIYQRGVYPPEMFKQEKKYGLTILTTTDPNLLT  
YLNENVLPQLTEWIEQGVVKRLVVVIRECETNETLERWQFEIECQSDGKENSNPKSKDISVI  
NSEIRAVIRQITATVTFLPLLEVPCSFDLLFYTNHDLVAPEHWEDSSACLINNSEVVKLSF  
STSVHKVDGAVSYKFSM

**Bub1:** XP\_026692557.1 (Gene model: KH2012:KH.C11.241)

MSNEITWEVCKENVQPLRHGRNVSYLNASLQTSDEISHSLMKQKKMLEEEILTGNLHDPID  
PWDYFKWSQQHFPEGKEDLKNFLQKYIVKFQNSDRYRNDPRYVNAWLTSQIHDDAPTTF  
YMKSKSIGINCASFYIMWAELEKSGNIKKAHSIYELGEENDAEPTELLSKMRNAFQLRAAR  
SISTKLNENEDDNKSELDSRRQRQALGSLDGRGKHKVLGTTRIGNTTAGVVRSPRTSFKE  
NRSSTKFKIFSEDENNEQHCVGNFASMPNNQINSKENTTAPSVWKGAEVQLNRNKTSTAIS  
SNKPFTICQDQDVPSQEQATPLASRKLSKSVEVILTERKWKKEESDFHRAIREQHGDADHN  
VVRMYPVEKVYSAVGEFQPEEILAACWLKKQREEEQKRLQRLQLEEQRKQIVESERREIEAQ  
RAYDDKVNQLKHREQQRLNLLQLFKDKEMQIEDKVEMVKEEQEMTIALHKVCSQLQHMQQKN  
NIVEVATSSQAIQGGKSLEDEVMECKPSSPTVCTKEAMGEIFGMFQKPLNTDVNVTKHEPS  
MMQQSQFSIYCDAMKDKTPVKFDIYEDASDNSENIPTPEYKQAPKREGLSGILQPAVGFKL  
EEDDFDDDGKDEDERLFDVYPLCDDNQSLYLDDRTVARAPMEKTTKNTEFPESFLNTLSH  
NPPSLQSTMHVNTNEIGDDFNNPHFSAESTTRWGGGATTATTTEEGVVKLSPILEATNEYEKS  
MSTKYQSGLVSLIPSMHRTNVSTAATEKFKFGAIGLEDDITIPEQSRVDSVIDESQAIDY

DFKDLCELMSTSLCKTTIDLMPDGIGDLSKPSLGLNIIPDPWNDQLLQGLIPSTLEGVIVA  
SESKVFRKGSVDVRIGNETYHLVKEIGKGAFAYKATMVSGDEVAVKVQSPAYKWEIHMLQE  
VRRRLEAKGHDVCKDYMTIMTAAVFQNSSCVVTQYLPSTLDFLNTNKNNTVDRENIALQI  
FHLVHSLHAIGVIGHGDVVKPDNLIANVSNRGPAPTLRLIDFGRAIDLSSLPPNTAFTDNCGT  
SGFVCSQMKTNPWNYHIDFNGVAGTLHVLHLSAYMKTMLNNKQEWVTTKKLPRWCDEKWSS  
AFHDLNLFPTPTNDWCPSLQDSPLPHLIQLFDA

**Bub3:** XP\_002129118.1 (Gene model: KH2012:KH.C5.394)

MANEFKLNNCPTDGISSVKFSPSTSQFLLASSWDMSVRLYDVTENSQRFKYEHKSPVLDCCF  
SDSVHWSWGGLDGSMYDLNTGRETIVGRHNSIRCVEYCSDTNVVVTGSWDQTIKLWDPR  
SHNNIGSYSQPGKVFTMSVCGDHIIVGTCGKSVVWDLRNMGYVEQRRESSLKYQTRCIKSF  
PNKQGYVLSSIEGRVAVEYLDPSVEVQKKKYAFKCHRIKENGIEHIYSVHAI AFHQRYSTFA  
TGGADGYVNMWDGFNKKRLCQFHLFPAAVSSSLAFSNDGSMLAVASSPLYGAELSPSSNGEDA  
IYIRHVTD AETKPKTSSGLA

**Mps1:** XP\_002124942.1 (Gene model: KH2012:KH.L149.3)

MASQFTTEGLGDNPDKWFMSLQSCNLQNGEEKNNLLKQIFVTANRSLTAEKHKTSEIYAKI  
LAEEAAFGVSTNVNKGKRMFKHAVYVCRTIPIIHLTYAQFEVRNGHFDKALHILEFGKMVTG  
CKLLFEQAISKLENGYVKFNSTLSMDLNQATPLKNITNTECNEKVTECQKRSYTD TALKTPP  
SYRFRALDTKYDYDIKTPSPMLKMSPTNTFPNRFTFNMPTSISKSSVTNFTPTPASATKTG  
LTKGPQVRVLRSLKSSLENADNDKEHDIGTHQTPYSLKHHPLVSNVEPQIPDSPKPPVIIDPS  
PINPPTPIIPLKKEIFPYPKQTPQPKLTPNPPKNLGTNLNPEIRQNPSKSTPMKTDTSNLNH  
NSMPPPKFPQVRVPCSKPAEPQNGLHTWFNPNSAICVNNKHVLYVIRELGEGGSSKVLQVFC  
AETKAILALKKVSLKDCDESTKNEFTNEIEFLLKLRRNPHIVHLYDFELTPDFIHLVMECGS  
TDLAKLLHSHKTQNSRLEVYEIIYFWKKMLLAVQTIHKHGVHRDLK PANFLLVKGNLKLID  
FGISNAINADATSVIKETQCGTLNYMAPEAILDMSGGYNPDSPKFKISPMADVWSLGCILYS  
MLYGCTPFQHIKHQLLKLNAITNDQHRIEFPPFKDENFVKIVQKCLKRNPKHRPTVDQLLQF  
S

*Branchiostoma lanceolatum:*

**Mad1:**

>lcl|BL00512\_evm0

MMGDFNSYLAEGRRQKSNSLLFDMGDTTAGKGDLTMQLD TTRDDSTVQWDRPETAKRNRVR  
RLEQTQAIEKEGELLWTRSKVAKLETAITQLTTEKKRDKIEFEKGQETFRMQYERDLEQVND  
LRHKLEFLVKEEKQAKEELAEERKKLTTIKTQMEKRIMVLQREKLCVQAEDELREASRSQI  
SNLRNQVKRLEAELEMSDSELAEAQQQVQH HQQAQARLEQVQQLQEDRIRAVTAEHKVKEL  
ELQLNQVQESAAMAKLMSTRLSRYEQLEKENKKLLEQNKFYRETSENNQLLKEKLLSLETKY  
GRAEHSNLELIKEVEDLRGLKQWEGIDPSGGQIPRSPAEIAKWIAELQ RKEVLLTEKTGQL  
TSSARDSEAGQKAATGRLREVESQLFAATEKTNQADLIKKLQRRLLLVTKDRDSIRNILVS  
YESEVTRASSDDAMLQRLQDSEEAQRYQRHMASLEEEMQRVNAQASEERIKAHKLEVELSQ  
MKTQTPAPAPNTISSQEV TMLRKKVEDLEKDRQKLLEEKEILEARVEQRHLQGNYP TTKTV  
VHFGLNPTALRRQHRQEELEKLREECEKLRQRLRAAEEGGADVTASILLTPSSKEMEDLKK  
QLTTAETKNTRLKEVFQQKIHEFRQACYMLLGYKVDVVKDNNYKLMSMYAERQEDCLMFQMV  
PGGELQLLETEFSNSQAVMMLVDLHLKTQHSIPAFLSALTDLFSQQTIA

**Mad2:**

>lcl|BL13880\_evm0

MAGVLQAAKNSITLKGSAEIVAEFFSYGINSILYQ RGIYPPETFSRVQKYVTGHDRQRAEDV  
LKQYWL LDKTVEKLVVVVTSIDTQEVLERWQFDIECDKMTDDSKPREKSQKEINDEIKAVI

RQITASVTFLPLLEENCSDLLIYTDKDLQVPETWEESGPHFIAKSEEVRLRSFSTSIHKVD  
AMVCYKNAD

### Bub1:

>lcl|BL16332\_cuf4

MDPTENSWELSKENVQPLRQGRKIANLTAALQPVNGHDGGLTRVQHEKQAFEAELRMYSGDD  
PFSVWDRIYKWTEQNYPKGGKDGSLSTLLERCLLFFKDDKRYSDNDHRYLQAWIKFAGMTNQF  
VDIYSFLHDQAIGAQVALFWEAWAELEQEGDTKKADAVYMEGIQKQAQPVDLLVRKQKEFQ  
ARVTRATLEGGVVQSADVSGTEAQRVTLGGLRGHGKKHQAPVNRTGAATKVYSSGLGVKPCA  
PPQVGQAFSVFSEDNPQDQVIPTPTGEWTNPPLPRVTSRENTHKPGKWTEAKVSQKAVPAIP  
FKAVSMNASSEFSIHVEEGAAQPQPTPQKPIEMGTQVLSARKPEKSLNPLRNMYPPEFEDEP  
NKIPKYCKKFVYTGLEEFQFEELRAARHVEMEKKRKMEEMRRQEEQRREMEKQHQLMLAQQ  
RQQLQQMQQTFOEQELALQQERKQMMEQCRQQMLRERAEEMERLLVDRMRDTTLESAQLPGAA  
PDGEPQDMPDSHAAQDSHIMPDSHAMQNSHVMQDSHAAQNSHTLKGSHVVQDSHIMLDSRQT  
MQDSHIMQDSHAAQENDPSTAAGLTESHREHTVTKHLNFEESLASGLQPSVVSAMAEIEDYK  
TDVEMVEPTPVKTAPOADTGDLRSGQFLLSSATPASTGKMVTSREQSLVKTPNTSTCSGPTP  
STTPGRRPITDPSPTINTKAAMMELGEFFRDDIGFGAVGGSDFEDMFAAGPSGGTASSGLS  
FSAPQAQTTFDFKGFITIFDESKDTGLEDRMDMKDNIVLEDQENNPFGGYQTGAKRRGLGVLQP  
SQGIPVEEIKEVDLDGIEPFADDNPDMTFASTGNQSSFCMARMASPTFNRGTGPELPELPA  
SSIRPVHNSTRKALGMLEISTTEDLAEAGGSGAGRVSAAESTEETFDMTVGNRPAAALSPIME  
NSSEEKSQVSTDHGSTDAPSLSVAMQSTSCADPSSESEAVATLNSPAEDEVFVTDVNPFD  
EVSLLAKVRGSLTSHQEYQEEDGHMPQIKPGVAINLGTELYHIDKLVGSGAFAKIYQASM  
LDADDLTDLGERKVTLKVQQPGCPWEFYINSQVHERVNRQLQDPMDIKPSLMSIDAMHVFSD  
GSVLVNEQHSCGSLLDIINLYRTAGKKMSEVMVVFYTLLEILYIVEQLHRCHIIHADLKPDNF  
LIRDGFEDKTECLFSGELRGLKLIDFGISLDMELFPNNTTFRARSNTSAFQCIEMQTKPWS  
YQADLYAIVSTVHCMLFGEYMKAYYEGGRWKITQTPRTHDPVWRRFFDTFLNIPSCDELPS  
LSYWISEFHCWEEKKTFDKEKWAQYTMFEKH

### Bub3:

>lcl|BL20329\_cuf2

ICQSYNYCPTYLHATNMPTVAETPNEFKLNNCPTDGISAVKFSPTSSQLLLVSSWDCSVRLY  
DVSGNNLRNKYTHSSAVLDCCFFDPVHPYSGGLDQMLKTCDLNTSQETVVGNHDAAIRCVEY  
CPEVNVVITGSDQTVKLWDPRTPCNAGSFSQPGKVYTMAVTGDRILVGTAGRRVLVWDLRN  
MGYVQQORRESSLKYQTRCIRAFPNKQGYVLSSIEGRVAVEYLDPSPEIQKKYAFKCHRIKE  
DGIEKIYPVNAIAFHSLHNTFATGGSDFVNIWDGFHKKRLCQFHRYPTSIASLAFSHDGSV  
LAIASSMYEELDVEHPEDAIYIRNVTDQETPKP

### Mps1:

>lcl|BL08039\_evm0

MVEKSDRQIMSRLKSLQSRLOSIYSRDEKDDTNNTGNLTGTGTYNLTDHTSWIDRISAAGNK  
PSDWLEFLTQAQGRTSFSSPQARYTYLLTVYDKALHMPVELCRRDESYAKILIQLAHIKGD  
HNEEDGQTGFKFARVNAKTFVHVAAAQFELSRGREEKAQSILQKGLDVGAEPTEMLNTAL  
IRLGNKEKLLMEDKENVWGICYPDSVQPSFSAAKPKGPALTKQQPPQNQTTPVDPSPSLVSM  
STIVFQKQGGCRNDSSGSSSLDENDTLPLLWGHREKPPQLSRSTWSATKLPGRELHTPQSQT  
QRVVTSHTEGPNANKRQPARVPLRVKRSSLPLKREMSTEDVNDDSDDTDCFLGVKPLKNIS  
PPTEGMDTLAARAKPPLPFTGRKVSPESTNTTNDKAFKGLSLCKFSKSSSLLSHTTPRGQ  
MLSKETSPTENTASSKPTPLRETSKAPLVSNPGHHSTHKNPITDSARKAQSIPTSTVVSF  
PERQPPCAKVPSASDTADAATVAFNSMQVPGAQASHMHIPPVSSNLPPGNKTIEHLPSQHAH  
QAPKMLDSLKSVVPEVRSNSLHTVGISHEVSGGQGSVQLGTRSGPATGPTVVPKNSQMPTPN  
IVNQNTMPGFFTPSASLPGAQQHVQQPHSQHFQQVAPPPQPFATPRMPCAPTERSDVICVK  
GKPFRIISIIGKGGSSKVYQVYDEKGVYALKLVNLEEGDETTVQGYINEITHLSNLQHSR  
VIKLYDFEVTDERIVLVMEKGSVDLATFLRNKKKQQGSIADDVLWFWYRHMLEAVDTIHRQG

IVHSDLKPANFLFVDGDLKLIDFGIANAIQSDKTSVIKDQQVGTLNYMSPETIREYNPAQYR  
DGNSKKLFKINCRSDVWSLGCILYYMVYGKTPFQHIPNHFAKLQAIVDPNYEIQFPPIKNHL  
LLDMLKKCLIRDPYNRPSTADLLAHPYLNSESSGAKEQPCPAAPALPMTADQIQQLLTQLS  
QAQSMSPNSISTVSKGLAAQLQSGQAPDLSAVLKKRQGPSQDKENLPPQHLLRKGPCTLQH  
ALPRPPSEHTLGRP
