# Supplementary material for: The Spindle Assembly Checkpoint Functions during Early Development in Non-Chordate Embryos
Source: MDPI journal article supplement (doi:10.3390/cells9051087), 2020-04-28
Supplement: s1 [file s1]

Table S1: Morphometric data for analysed embryos

| Egg diameter (µm) |              |            |             |             |             |
|-------------------|--------------|------------|-------------|-------------|-------------|
| Ch                | Pl           | Pm         | Ha          | Mg          | Bl          |
| 224               | 95           | 136        | 154         | 64          | 133         |
| 210               | 95           | 131        | 153         | 65          | 133         |
| 218               | 91           | 133        | 163         | 65          | 136         |
| 200               | 93           | 132        | 162         | 67          | 130         |
| 196               | 91           | 131        | 160         | 64          | 134         |
| 200               | 95           | 128        | 158         | 64          | 136         |
| 190               | 90           | 132        | 159         | 64          | 133         |
| 216               | 91           | 129        | 158         | 66          | 133         |
| 208               | 92           | 131        | 157         | 64          | 136         |
| 200               | 91           | 129        | 160         | 64          | 134         |
| 216               | 91           | 132        | 160         | 64          | 133         |
| 210               | 90           | 128        | 156         | 62          | 135         |
| 218               | 93           | 127        | 154         | 64          | 133         |
| 234               | 89           | 134        | 157         | 62          | 133         |
| 214               | 94           | 128        | 165         | 62          | 135         |
| 212               | 91           | 132        | 162         | 65          | 135         |
| 202               | 90           | 133        | 161         | 64          | 135         |
| 200               | 92           | 129        | 161         | 65          | 136         |
| 212               | 89           | 127        | 161         | 64          | 134         |
| 235               | 93           | 128        | 156         | 65          | 135         |
| 218               | 91           | 130        | 160         | 66          | 132         |
| 218               | 91           | 132        | 160         | 65          | 132         |
| 198               | 90           | 129        | 162         | 65          | 133         |
| 220               | 92           | 131        | 157         | 64          | 134         |
| 202               | 92           | 133        | 164         | 66          | 133         |
| 210               | 95           | 128        | 160         | 65          | 133         |
| 216               | 90           | 129        | 165         | 64          | 133         |
| 208               | 89           | 131        | 150         | 65          | 133         |
| 202               | 91           | 131        | 155         | 67          | 132         |
| 207               | 90           | 130        | 149         | 65          | 134         |
| 218               | 91           | 128        | 149         |             |             |
| 232               |              | 132        | 149         | 64,5        | 133         |
|                   | 91,5483871   |            | 154         | 1,224275531 | 1,417866294 |
| 211               | 1,804415135  | 130,4375   | 152         |             |             |
| 10,95665949       |              | 2,19878999 | 147         |             |             |
|                   |              |            | 146         |             |             |
|                   |              |            | 152         |             |             |
|                   |              |            | 152         |             |             |
|                   |              |            | 150         |             |             |
|                   |              |            | 150         |             |             |
|                   |              |            | 150         |             |             |
|                   |              |            | 160         |             |             |
|                   |              |            | 143         |             |             |
|                   |              |            | 154         |             |             |
|                   |              |            | 157         |             |             |
|                   |              |            | 154         |             |             |
|                   |              |            | 154         |             |             |
|                   |              |            | 149         |             |             |
|                   |              |            | 152         |             |             |
|                   |              |            | 153         |             |             |
|                   |              |            | 150         |             |             |
|                   |              |            | 151         |             |             |
|                   |              |            | 148         |             |             |
|                   |              |            | 148         |             |             |
|                   |              |            | 146         |             |             |
|                   |              |            | 155,0727273 |             |             |
|                   |              |            | 5,493614291 |             |             |
| avarage           | standard dev |            |             |             |             |

| Nuclear diameter (μm) |             |             |             |             |
|-----------------------|-------------|-------------|-------------|-------------|
| Ch                    | Pl          | Pm          | Mg (Nup)    | Mg (BF)     |
| 10                    | 17,5        | 16          | 17          | 15          |
| 10                    | 15,5        | 16          | 17          | 15          |
| 8                     | 15,5        | 16          | 17          | 16          |
| 7                     | 15          | 18          | 18          | 16          |
| 8                     | 14,5        | 16          | 15          | 15          |
| 9                     | 15          | 12          | 19          | 15          |
| 8,5                   | 13,5        | 12          | 18          | 15          |
| 8                     | 12,5        | 14          | 14          | 16          |
| 9                     | 15          | 16          | 15          | 18          |
| 8,5                   | 15          | 16          | 17          | 16          |
| 9                     | 15          | 16          | 17          | 16          |
| 7,6                   | 15          | 12          | 16          | 16          |
| 8                     | 13,5        | 10          | 18          | 17          |
| 10                    | 13,5        | 12          | 18          | 16          |
| 7                     | 14          | 12          | 19          | 18          |
|                       | 16,5        | 14          | 17          | 18          |
| 8,5                   | 13          | 14          | 17          | 15          |
| 0,993167132           | 15          | 10          | 17          | 16          |
|                       | 15          | 10          | 17          | 19          |
|                       | 14,5        | 14          | 17          | 17          |
|                       | 15          | 12          | 18          | 16          |
|                       | 15          | 15          | 20          | 17          |
|                       | 13,5        | 15          | 18          | 16          |
|                       | 14          | 12          | 19          | 14          |
|                       | 13          | 14          | 17          | 15          |
|                       | 16          | 14          | 19          | 15          |
|                       | 14,5        | 12          | 17          | 16          |
|                       | 13,5        |             | 17          | 15          |
|                       | 14,5        | 13,7037037  | 19          | 17          |
|                       | 12,5        | 2,180592982 | 19          |             |
|                       | 14          |             | 16          | 16,06896552 |
|                       | 14          |             | 19          | 1,162848549 |
|                       | 11          |             | 20          |             |
|                       |             |             | 22          |             |
|                       | 14,37878788 |             | 19          |             |
|                       | 1,25018938  |             | 15          |             |
|                       |             |             | 17,5        |             |
|                       |             |             | 15          |             |
|                       |             |             | 12,5        |             |
|                       |             |             | 12,5        |             |
|                       |             |             | 17          |             |
|                       |             |             | 15,5        |             |
|                       |             |             | 18          |             |
|                       |             |             | 15,5        |             |
|                       |             |             | 18          |             |
|                       |             |             | 15,5        |             |
|                       |             |             | 15,5        |             |
|                       |             |             | 14          |             |
|                       |             |             | 17,5        |             |
|                       |             |             | 14          |             |
|                       |             |             | 13,5        |             |
|                       |             |             | 12          |             |
|                       |             |             | 13,5        |             |
|                       |             |             | 12          |             |
|                       |             |             | 11          |             |
|                       |             |             | 13,5        |             |
|                       |             |             |             |             |
|                       |             |             | 16,5625     |             |
|                       |             |             | 2,296365706 |             |

| Volume blastomere at 2-cell stage (cell Mask Orange) |                    |                    |                    |                            |                            |
|------------------------------------------------------|--------------------|--------------------|--------------------|----------------------------|----------------------------|
| Ch x10 <sup>5</sup>                                  | Pm 10 <sup>5</sup> | Pl 10 <sup>5</sup> | Bl 10 <sup>5</sup> | Mg (Large) 10 <sup>4</sup> | Mg (small) 10 <sup>4</sup> |
| 18,4                                                 | 6,1                | 2,3                | 5,2                | 8,3                        | 4,5                        |
| 20                                                   | 7,5                | 2,1                | 5,18               | 7,9                        | 4,6                        |
| 19,2                                                 | 7,2                | 2,3                | 5,2                | 8,2                        | 4,5                        |
| 16,3                                                 | 7,3                | 2,1                | 5,12               | 8,4                        | 4,3                        |
| 17,2                                                 | 7,3                | 2,4                | 5,23               | 8,2                        | 4,475                      |
| 19                                                   | 7,5                | 2                  | 5,2                | 8,25                       | 4,5                        |
| 16,3                                                 | 7,6                | 2,2                | 5                  | 0,21602469                 | 0,125830574                |
| 16                                                   | 7,2                | 2,3                | 4,5                |                            |                            |
| 24                                                   | 7,1                | 2,05               | 4,7                |                            |                            |
| 22                                                   | 7,2                | 1,8                | 5                  |                            |                            |
| 22                                                   | 7,2                | 1,9                | 5,5                |                            |                            |
| 20                                                   | 6,9                | 1,7                | 4,8                |                            |                            |
| 17,4                                                 | 6,3                | 1,7                | 4,8                |                            |                            |
| 21,5                                                 | 6,1                | 1,8                | 5,7                |                            |                            |
| 18,5                                                 | 6,7                | 1,6                | 5,3                |                            |                            |
| 20                                                   | 6                  | 1,7                | 4,5                |                            |                            |
| 20                                                   | 5,8                | 1,8                | 4,6                |                            |                            |
| 20,4                                                 | 5,8                | 1,8                | 4,6                |                            |                            |
| 23,8                                                 | 5,5                | 1,9                | 5,007222222        |                            |                            |
| 24                                                   | 5,4                | 1,8                | 5,06               |                            |                            |
| 18,6                                                 | 5,7                | 1,9625             | 0,346304958        |                            |                            |
| 19,1                                                 | 5,5                | 1,9                |                    |                            |                            |
| 16,2                                                 | 5,7                | 0,242180337        |                    |                            |                            |
| 19,56086957                                          | 5,9                |                    |                    |                            |                            |
| 19,2                                                 | 6,520833333        |                    |                    |                            |                            |
| 2,468481154                                          | 6,5                |                    |                    |                            |                            |
|                                                      | 0,764414619        |                    |                    |                            |                            |

| Volume M. galloprovincialis blastomere at 2-cell stage (mathematical) |                                    |
|-----------------------------------------------------------------------|------------------------------------|
| Large Blastomere x 10 <sup>4</sup>                                    | Small Blastomere x 10 <sup>4</sup> |
| 12                                                                    | 3,5                                |
| 10,5                                                                  | 4,2                                |
| 11,4                                                                  | 4,7                                |
| 10,5                                                                  | 3,9                                |
| 11,6                                                                  | 3,6                                |
| 10,8                                                                  | 3,9                                |
| 10,1                                                                  | 4,2                                |
| 9,3                                                                   | 5                                  |
| 11,2                                                                  | 3,8                                |
| 9,9                                                                   | 4,7                                |
| 9,6                                                                   | 3,5                                |
| 9,7                                                                   | 4,9                                |
| 11,3                                                                  | 4,6                                |
| 10,7                                                                  | 4,4                                |
| 10,7                                                                  | 3,7                                |
| 13,8                                                                  | 4,5                                |
| 9,7                                                                   | 3,6                                |
| 11,9                                                                  | 4                                  |
| 9,9                                                                   | 4,2                                |
| 11                                                                    | 4,1                                |
| 11,7                                                                  | 4,5                                |
| 11,8                                                                  | 3,2                                |
| 11                                                                    | 4                                  |
| 11,3                                                                  | 4,4                                |
| 11,5                                                                  | 4,4                                |
| 10                                                                    | 4,5                                |
| 11,4                                                                  | 4,4                                |
| 11                                                                    | 4,7                                |
| 10,90357143                                                           | 4,182142857                        |
| 11                                                                    | 4,2                                |
| 0,95935246                                                            | 0,465119317                        |
